# Supplementary material
Source: PubMed Central journal article supplement (PMC1635478)
Supplement: rspb20063544s12.pdf [file rspb20063544s12.pdf]

**Supplementary Material****SOURCES OF DATA AND ESTIMATED PARAMETERS FOR BIRDS AND MAMMALS***Sources of data*

Details for avian embryonic growth may be found in Ricklefs (1987). Details for mammalian fetal growth are presented in the following table. Growth curves were fit by non-linear least-squares regression (SAS procedure NLIN) of the equation  $W = a(x - t_0)^b$ , where  $W$  is embryo mass,  $x$  is age in days,  $t_0$  is a lag in onset of embryo growth,  $b$  is the exponent of the relationship and  $a$  is a scaling constant. Results are presented as the estimate and its asymptotic standard error.  $N$  is the number of embryos or daily average masses used to estimate the growth function. Beta is the acceleration of aging-related mortality, estimated from age-at-death data in zoo populations, provided courtesy of the International Species Information System (ISIS).  $N_d$  is the number of ages at death used to construct the survival curve for each species.

| Genus              | Species           | Common name        | Ref | $N$ | $t_0$ | $t_0$ SE | $\log a$ | $\log a$ SE | $b$  | $b$ SE | $\beta$           | $N_d$ |
|--------------------|-------------------|--------------------|-----|-----|-------|----------|----------|-------------|------|--------|-------------------|-------|
| <i>Capra</i>       | <i>hircus</i>     | Goat               | 1   | 15  | 43.4  | 6.3      | -1.615   | 0.707       | 2.50 | 0.33   | 1.90              | 109   |
| <i>Papio</i>       | <i>anubis</i>     | Baboon             | 2   | 9   | 45.1  | 4.9      | -1.690   | 0.626       | 2.18 | 0.30   | 2.12              | 37    |
| <i>Sus</i>         | <i>scrofa</i>     | Pig                | 3   | 5   | 45.2  | 4.7      | -0.119   | 0.648       | 1.65 | 0.34   | 2.49              | 35    |
| <i>Homo</i>        | <i>sapiens</i>    | Human <sup>1</sup> | 4   | 21  | 63.4  | 0.9      | -1.865   | 0.082       | 2.31 | 0.04   | 2.95 <sup>5</sup> | 35    |
| <i>Homo</i>        | <i>sapiens</i>    | Human <sup>2</sup> | 4   | 21  | 65.0  | 1.0      | -1.769   | 0.086       | 2.27 | 0.04   | 2.95 <sup>5</sup> | 35    |
| <i>Homo</i>        | <i>sapiens</i>    | Human <sup>3</sup> | 4   | 22  | 63.5  | 1.5      | -1.917   | 0.134       | 2.34 | 0.06   | 2.95 <sup>5</sup> | 35    |
| <i>Lepus</i>       | <i>americanus</i> | Snowshoe hare      | 5   | 15  | 1.3   | 2.6      | -6.643   | 1.372       | 5.60 | 0.80   | 3.43 <sup>6</sup> | 145   |
| <i>Oryctolagus</i> | <i>cuniculus</i>  | European rabbit    | 6   | 36  | 7.4   | 1.5      | -4.870   | 0.840       | 4.91 | 0.53   | 3.43 <sup>6</sup> | 145   |
| <i>Bos</i>         | <i>taurus</i>     | Cow                | 7   | 17  | 6.8   | 5.4      | -7.861   | 0.923       | 5.24 | 0.39   | 3.88 <sup>9</sup> | 48    |
| <i>Bos</i>         | <i>taurus</i>     | Cow                | 7   | 16  | 10.9  | 3.7      | -7.169   | 0.644       | 4.94 | 0.28   | 3.88              | 48    |
| <i>Bos</i>         | <i>taurus</i>     | Cow                | 8   | 7   | -44.2 | 25.6     | -8.704   | 1.814       | 5.32 | 0.66   | 3.88              | 48    |

|                  |                   |                |    |     |                 |     |        |       |      |      |                   |     |
|------------------|-------------------|----------------|----|-----|-----------------|-----|--------|-------|------|------|-------------------|-----|
| <i>Cervus</i>    | <i>canadensis</i> | Elk            | 9  | 8   | 17.1            | 1.5 | -6.784 | 0.555 | 4.83 | 0.28 | 3.92              | 144 |
| <i>Rattus</i>    | <i>norvegicus</i> | Rat            | 10 | 7   | 9.1             | 1.0 | -3.709 | 0.755 | 4.01 | 0.59 | 4.00 <sup>7</sup> | 23  |
| <i>Macaca</i>    | <i>mulatta</i>    | Rhesus macaque | 11 | 6   | 41.2            | 2.7 | -1.163 | 0.425 | 1.87 | 0.21 | 4.02              | 16  |
| <i>Mus</i>       | <i>musculus</i>   | Mouse          | 12 | 19  | 6.8             | 0.5 | -4.267 | 0.441 | 4.03 | 0.37 | 5.06 <sup>8</sup> | 123 |
| <i>Mus</i>       | <i>musculus</i>   | Mouse          | 13 | 11  | 7.3             | 0.1 | -3.602 | 0.105 | 3.59 | 0.11 | 5.06 <sup>8</sup> | 123 |
| <i>Ovis</i>      | <i>aries</i>      | Sheep          | 14 | 44  | 24.8            | 1.5 | -3.267 | 0.272 | 3.33 | 0.13 | 3.71              | 54  |
| <i>Ovis</i>      | <i>aries</i>      | Sheep          | 14 | 130 | 6.6             | 0.8 | -6.496 | 0.212 | 4.77 | 0.10 | 3.71              | 54  |
| <i>Aepyceros</i> | <i>melampus</i>   | Impala         | 15 | 25  | 3.4             | 3.9 | -6.594 | 0.623 | 4.50 | 0.27 | 4.28              | 208 |
| <i>Equus</i>     | <i>caballus</i>   | Horse          | 16 | 26  | -- <sup>4</sup> | --  | -7.613 | 0.706 | 3.69 | 0.29 | 3.48              | 135 |

---

<sup>1</sup>White male; <sup>2</sup>white female; <sup>3</sup>negro both sexes; <sup>4</sup>initial age fixed at 0; <sup>5</sup>value for zoo populations of the gorilla *Gorilla gorilla*; <sup>6</sup>value for the European rabbit *Oryctolagus cuniculus*; <sup>7</sup>value for the roof rat *Rattus rattus*; <sup>8</sup>lowest value of several inbred strains of the laboratory mouse; <sup>9</sup>data of Winters.

References: 1. (Elliott et al. 1934); 2. (Hendrickx 1971); 3. (Tumbleson et al. 1972); 4. (Weinbach 1941); 5. (Bookhout 1964); 6. (Danielson and Kihlström 1986); 7. (Nichols 1944); 8. (Hubbert et al. 1972); 9. (Morrison et al. 1959); 10. (Huggett and Widdas 1951); 11. (Bourne 1975); 12. (Rugh 1990); 13. (MacDowell and Allen 1927; MacDowell et al. 1927); 14. (Joubert 1956); 15. (Fairall 1969); 16. (Meyer and Ahlswede 1976).

Details for embryo growth and aging parameters for birds are presented in the following table.

| Species <sup>1</sup>                         | Embryo growth parameters <sup>2</sup> |     |          |     |      |      | Aging parameters <sup>3</sup> |         |
|----------------------------------------------|---------------------------------------|-----|----------|-----|------|------|-------------------------------|---------|
|                                              | $t_0$                                 | SE  | $\log a$ | SE  | $b$  | SE   | $\alpha$                      | $\beta$ |
| <i>Pygoscelis adeliae</i> <sup>4</sup>       | 1.4                                   | 4.3 | -11      | 3.8 | 4.42 | 0.95 | 5.36E-05                      | 3.14    |
| <i>Pelecanus occidentalis</i>                | -3                                    | 1   | -14      | 1.2 | 5.16 | 0.32 | 5.90E-07                      | 4.48    |
| <i>Larus marinus</i> <sup>5</sup>            | -1.3                                  | 4.2 | -8.4     | 3.7 | 3.81 | 0.96 | 3.33E-05                      | 2.96    |
| <i>Sterna hirundo</i> <sup>6</sup>           | -1.1                                  | 5.2 | -7.7     | 4.9 | 3.38 | 1.37 | 5.76E-05                      | 3.11    |
| <i>Uria algae</i> <sup>7</sup>               | -0.2                                  | 2   | -13.1    | 2.5 | 5    | 0.64 | 1.55E-03                      | 2.23    |
| <i>Diomedea immutabilis</i> <sup>8</sup>     | 18.7                                  | 3.7 | -3.2     | 1.4 | 2.23 | 0.33 | 6.68E-05                      | 2.01    |
| <i>Diomedea nigripes</i> <sup>8</sup>        | 17.7                                  | 2.3 | -3.6     | 1   | 2.32 | 0.23 | 6.68E-05                      | 2.01    |
| <i>Pterodroma hypoleuca</i> <sup>9</sup>     | 9.6                                   | 2.7 | -2.9     | 1.1 | 1.67 | 0.27 | 2.26E-03                      | 1.34    |
| <i>Anous stolidus</i> <sup>6</sup>           | 1.8                                   | 2.2 | -5.6     | 1.3 | 2.54 | 0.32 | 5.76E-05                      | 3.11    |
| <i>Dendrocygnus autumnalis</i> <sup>10</sup> | -3.4                                  | 2.7 | -9.2     | 2.5 | 3.62 | 0.65 | 7.09E-03                      | 1.38    |
| Domestic goose <sup>11</sup>                 | 0.7                                   | 0.2 | -7.3     | 0.4 | 3.62 | 0.11 | 5.34E-07                      | 4.69    |
| Embden (domestic) goose <sup>11</sup>        | 0.2                                   | 0.6 | -8.6     | 1   | 3.96 | 0.29 | 5.34E-07                      | 4.69    |
| <i>Aythya americana</i>                      | 0.4                                   | 2.7 | -8.3     | 2.9 | 3.75 | 0.8  | 5.49E-03                      | 1.29    |
| <i>Anas strepera</i>                         | -1.9                                  | 3.8 | -10.9    | 4   | 4.47 | 1.03 | 1.39E-05                      | 4.17    |
| <i>Anas platyrhynchos</i>                    | 3.1                                   | 0.6 | -4.9     | 0.6 | 2.73 | 0.62 | 4.46E-03                      | 1.33    |
| <i>Phasianus colchicus</i>                   | 1.9                                   | 0.1 | -5.3     | 0.2 | 2.7  | 0.07 | 1.87E-03                      | 2.01    |
| Domestic turkey <sup>12</sup>                | 1.5                                   | 0.1 | -6       | 0.2 | 3.09 | 0.07 | 1.06E-03                      | 2.46    |
| Jungle fowl <sup>13</sup>                    | 0.4                                   | 0.4 | -8.2     | 0.6 | 3.82 | 0.19 | 1.11E-04                      | 3.63    |

|                                       |      |     |      |     |      |      |          |      |
|---------------------------------------|------|-----|------|-----|------|------|----------|------|
| Domestic pigeon <sup>14</sup>         | -0.4 | 0.4 | -8.2 | 0.5 | 3.67 | 0.17 | 7.27E-07 | 4.87 |
| <i>Agapornis roseicollis</i>          | 2    | 0.6 | -7.1 | 0.7 | 2.69 | 0.21 | 4.70E-03 | 2.32 |
| <i>Sturnus vulgaris</i> <sup>15</sup> | 1.3  | 0.4 | -6.3 | 0.9 | 3.38 | 0.35 | 3.24E-04 | 2.52 |
| <i>Poephila guttata</i> <sup>16</sup> | 2.3  | 0.6 | -5.3 | 0.8 | 1.98 | 0.28 | 3.89E-02 | 1.17 |

---

## Notes:

<sup>1</sup>Species names apply to embryo growth data; sources of survival data are explained in notes

below when they do not pertain to the same species. The genus name for *D. immutabilis* and *D. nigripes* as been changed to *Phoebastria*.

<sup>2</sup>All embryo growth data are from Ricklefs (1987). Values are expressed as estimates and their asymptotic standard errors (SE).  $t_0$  is the lag time prior to the onset of increase in embryo mass described by a power function.

<sup>3</sup>Parameters  $\alpha$  and  $\beta$  of the Weibull functions relating mortality rate to age; estimates of initial mortality rate ( $m_0$ ) not shown. All original data are based on survival records from captive populations in zoos (data from the International Species Information System, ISIS) except for *L. marinus*, *D. immutabilis*, *D. nigripes*, *P. hypoleuca*, and *P. colchicus*, which pertain to wild populations and are from Ricklefs (1998).

<sup>4</sup>Survival data for *Spheniscus humboldti*; for *S. demersus* the value of  $\beta$  was 3.60.

<sup>5</sup>Survival data for European gull *Larus canus*.

<sup>6</sup>Survival data for the South American tern *Larosterna inca*.

<sup>7</sup>Survival data for the North Atlantic alcid *Fratercula arctica*; for the closely related *Lunda cirrhata*,  $\beta = 2.97$ .

<sup>8</sup>Survival data for the southern ocean albatross, *Diomedea exulans*.

<sup>9</sup>Survival data for the related petrel *Puffinus tenuirostris*.

<sup>10</sup>Survival data for *D. autumnalis* may be atypical; for the related species *D. viduata* and *D. bicolor*, values of  $\beta$  were 3.27 and 3.73, respectively.

<sup>11</sup>Survival data for the domestic goose *Anser anser*.

<sup>12</sup>Survival data for the domestic turkey *Meleagris gallopavo*.

<sup>13</sup>Survival data for the jungle fowl *Gallus gallus* in captivity.

<sup>14</sup>Survival data for the domestic pigeon (rock dove) *Columba livea* in captivity.

<sup>15</sup>Average from survival data for the related starlings *Lamprotornis iris* and *Spreo superbus*;  $\beta$  values for other species of starling were *Leucopsar rothschildi* = 2.57 and *Gracula religiosa* = 2.72.

<sup>16</sup>Value of  $\beta$  for *Poephila guttata* is lower than for the related *P. acuticauda* (2.91).

## References

- Bookhout, T. A. 1964. Prenatal development of snowshoe hares. *Journal of Wildlife Management* 28:338-345.
- Bourne, G. H. 1975. Collected anatomical and physiological data from the rhesus monkey, Pages 1-63 *in* G. H. Bourne, ed. *The Rhesus Monkey. Volume I. Anatomy and Physiology.* New York, Academic Press.
- Danielson, M., and I. Kihlström. 1986. Calcification of the rabbit fetal skeleton. *Growth* 50:378-384.
- Elliott, R. H., F. G. Hall, and A. S. G. Huggett. 1934. The blood volume and oxygen capacity of the foetal blood in the goat. *Journal of Physiology* 82:160-171.
- Fairall, N. 1969. Prenatal development of the impala *Aepyceros melampus*. *Licht. Koedoe* 12:97-103.
- Hendrickx, A. G. 1971, *Embryology of the Baboon.* Chicago, University of Chicago Press.
- Hubbert, W. T., O. H. V. Stalheim, and G. D. Booth. 1972. Changes in organ weights and fluid volumes during growth of the bovine fetus. *Growth* 36:217-233.
- Huggett, A. S. G., and W. F. Widdas. 1951. The relationship between mammalian foetal weight and conception age. *Journal of Physiology* 114:306-317.
- Joubert, D. M. 1956. A study of pre-natal growth and development in the sheep. *Journal of Agricultural Science* 47:382-428.
- MacDowell, E. C., and E. Allen. 1927. Weight of mouse embryos 10-18 days after conception, a logarithmic function of embryo age. *Proceedings of the Society for Experimental Biology and Medicine* 24:672-674.

MacDowell, E. C., E. Allen, and C. G. MacDowell. 1927. The prenatal growth of the mouse. *Journal of General Physiology* 11:57-70.

Meyer, H., and L. Ahlswede. 1976. Über das intrauterine Wachstum und die Körperzusammensetzung von Fohlen sowie den Nährstoffbedarf tragender Stuten. *Übersichten zur Tierernährung* 4:263-292.

Morrison, J. A., C. E. Trainer, and P. L. Wright. 1959. Breeding season in elk as determined from known-age embryos. *Journal of Wildlife Management* 23:27-34.

Nichols, C. W., Jr. 1944. The embryology of the calf: fetal growth weights, relative age and certain body measurements. *American Journal of Veterinary Research* 5:135-141.

Ricklefs, R. E. 1987. Comparative analysis of avian embryonic growth. *Journal of Experimental Zoology Supplement* 1:309-323.

—. 1998. Evolutionary theories of aging: confirmation of a fundamental prediction, with implications for the genetic basis and evolution of life span. *American Naturalist* 152:24-44.

Rugh, R. 1990. *The Mouse. Its Reproduction and Development*. Oxford, Oxford University Press.

Tumbleson, M. E., O. W. Tinsley, K. W. Kicklin, and J. B. Mulder. 1972. Fetal and neonatal development of Sinclair (S-1) miniature piglets effected by maternal dietary protein deprivation. *Growth* 36:373-387.

Weinbach, A. P. 1941. The human growth curve: I. Prenatal. *Growth* 5:217-233.
